# Supplementary material
Source: PubMed Central journal article supplement (PMC3416192)
Supplement: MCB.05611-11_zmb999109579so2.pdf [file MCB.05611-11_zmb999109579so2.pdf]

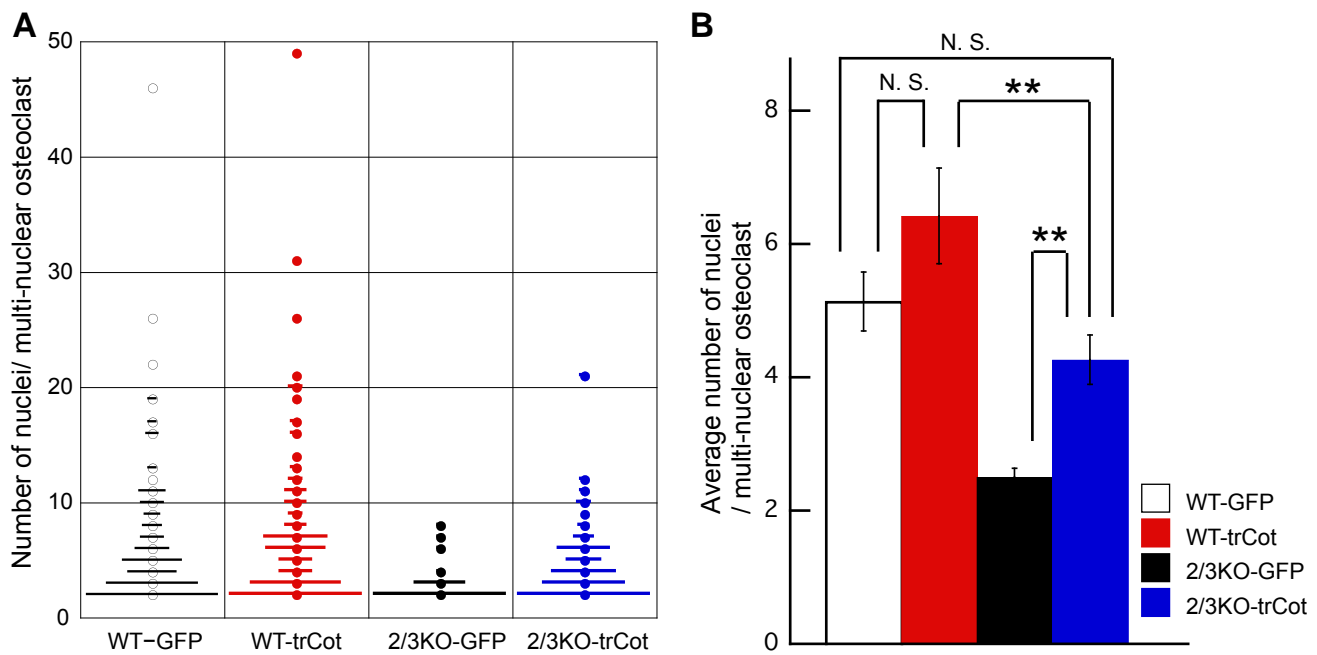

**Supplemental Figure 1 The number of nuclei in multinuclear osteoclasts overexpressing trCot**

(A) The number of nuclei in individual multinuclear osteoclasts. The horizontal lines of varying length at the dots indicate the number of cells. n= 70. (B) The average number of nuclei in multinuclear osteoclasts infected with GFP (control) or trCot-expressing virus. Shown are means  $\pm$  SEM. n=70. \*\*P < 0.01. N.S., difference not significant.
