# Supplementary material
Source: PubMed Central journal article supplement (PMC3416192)
Supplement: MCB.05611-11_zmb999109579so3.pdf [file MCB.05611-11_zmb999109579so3.pdf]

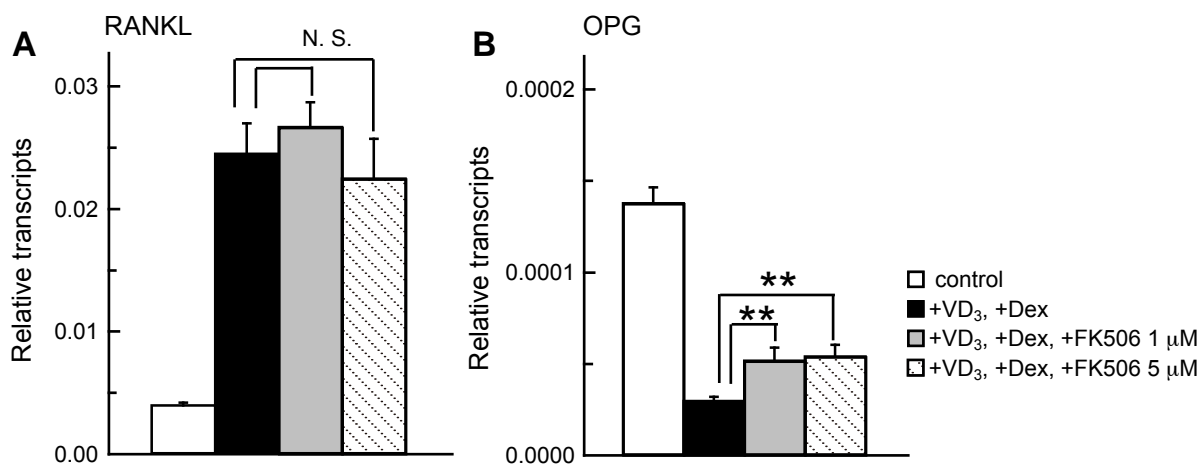

**Supplemental Figure 2 The effect of FK506 on RANKL and OPG expression on ST2 cells**

The mRNA expression levels of RANKL (A) and OPG (B) on ST2 cells by TaqMan PCR analysis. RANKL expression was induced, while OPG expression was reduced by induction medium including 1,25-dihydroxyvitamin D<sub>3</sub> (VD<sub>3</sub>) and dexamethasone (Dex). The effect of FK506 is examined at the dose of 1 μM and 5 μM FK506 in the induction medium. n=3 each group. \*\*P < 0.01. N.S., difference not significant.
