# Supplementary material
Source: PubMed Central journal article supplement (PMC3416192)
Supplement: MCB.05611-11_zmb999109579so5.pdf [file MCB.05611-11_zmb999109579so5.pdf]

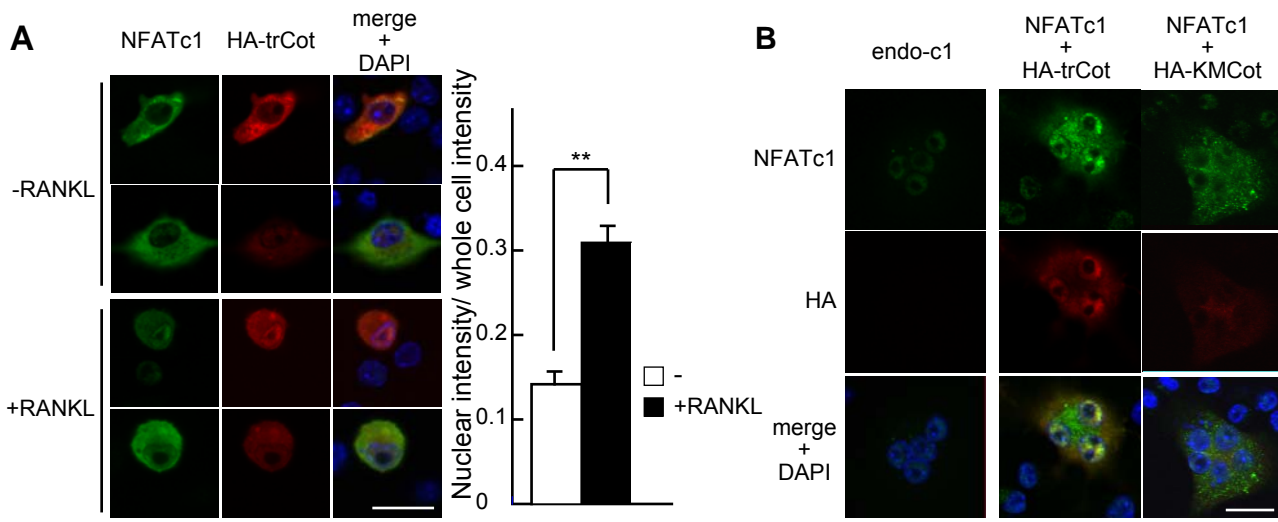

**Supplemental Figure 4 NFATc1 localization in RANKL-treated or nontreated RAW 264.7 cells.**

(A) The effect of RANKL-stimulation on localization of overexpressed NFATc1 in RAW 264.7 cells. Left graph indicates the ratio of NFATc1 staining in the nucleus relative to the entire cell in NFATc1 and HA-trCot co-expressing cells. Scale bars represent 20  $\mu$ m. Shown are means  $\pm$  SEM; n=30. \*\*P < 0.01. (B) Localization of endogenous or exogenous NFATc1 in RANKL-treated multinuclear cells. Scale bars represent 20  $\mu$ m.
