# Supplementary material
Source: PubMed Central journal article supplement (PMC3416192)
Supplement: MCB.05611-11_zmb999109579so6.pdf [file MCB.05611-11_zmb999109579so6.pdf]

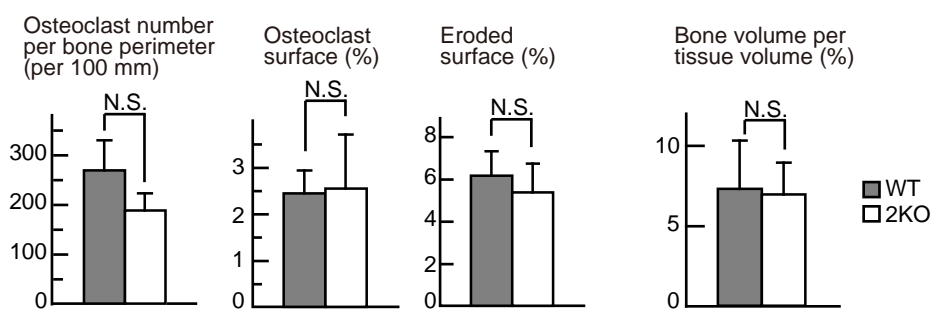

**Supplemental Figure 5 Bone histomorphometric parameters of osteoclastic bone resorption, and bone volume in the tibia of wild-type (WT) and IP3R2KO (2KO) mice (at 10 weeks of age, female). N.S., difference not significant. n=4 each group.**
