# Supplementary material
Source: PubMed Central journal article supplement (PMC3416192)
Supplement: MCB.05611-11_zmb999109579so7.pdf [file MCB.05611-11_zmb999109579so7.pdf]

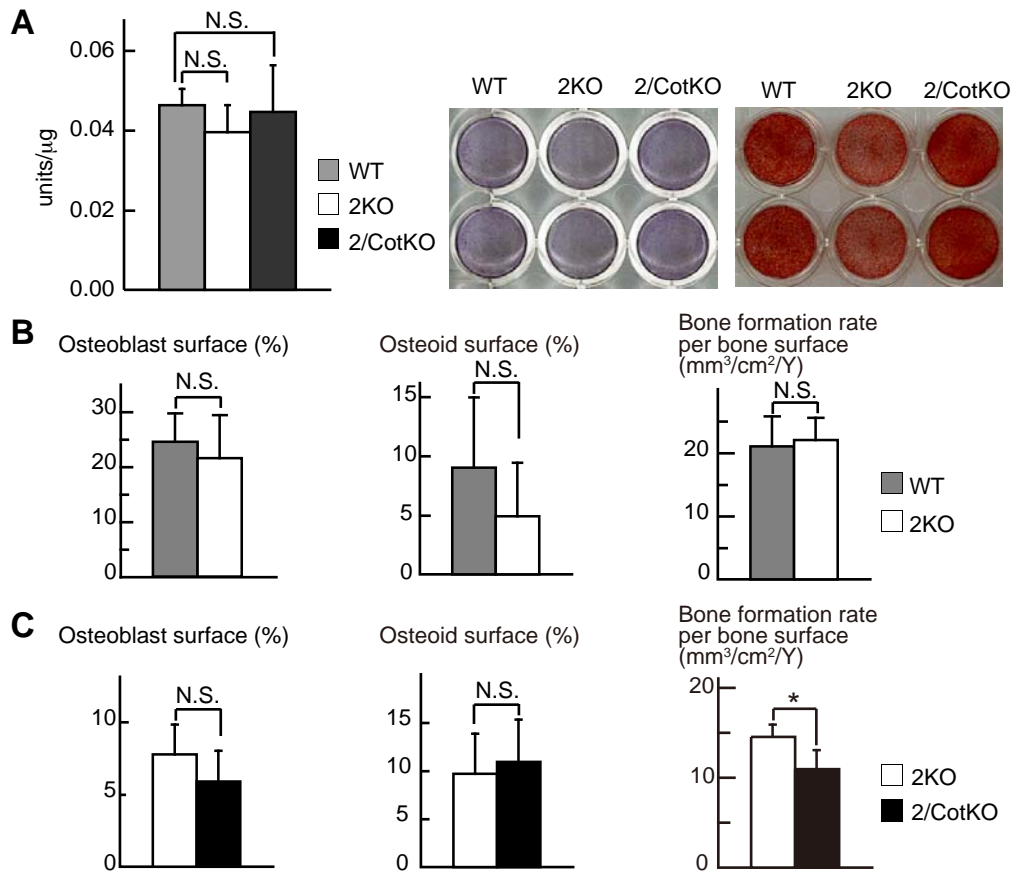

**Supplemental Figure 6 Osteoblastogenesis of wild type (WT), IP3R2KO(2KO), and IP3R2/CotKO (2/CotKO) mice** (A) ALP activity (left panel) and ALP staining (middle panel) at 7 days of culture, in WT (gray square), 2KO (white square), and 2/CotKO (black square) cells. Mineralized extracellular matrix was observed with Alizarin Red S staining (right panel) at 10 days of culture. (B)(C) Osteoblastic parameters in the tibia of WT and 2KO (at 10 weeks of age, female) (B), 2KO and 2/CotKO mice (at 10 weeks of age, male)(C). \*\* $P < 0.05$ . N.S., difference not significant.  $n=4$  each group.
